# Supplementary material for: Trade of Economically and Physically Scarce Virtual Water
Source: Research Square preprint supplement (doi:10.21203/rs.3.rs-646879/v1), 2021-06-23
Supplement: Supplementary file 1 [file 0e0c2e2fed8b0e88f50e0b54.pdf]

# TRADE OF ECONOMICALLY AND PHYSICALLY SCARCE VIRTUAL WATER

## SUPPLEMENTARY MATERIAL

**Figure S1.** Scatterplot between the gap exporter-importer for each bilateral VW flux regarding the composite water scarcity index (CWSI, 2017) and income (GNI per capita in USD, Atlas method, 2016). Each dot represents one bilateral VW flux that includes all primary crops, for a total of 22,200 fluxes. Dot colors refer to the bar on the right. A lighter color corresponds to a larger flux (in log m<sup>3</sup>), and vice versa. We observe a concentration of large fluxes in quarter IV, in which water-related and economic unfairness is at the highest levels. (squaredR = 0.19). Sources: The World Bank (2020b), authors' elaboration.

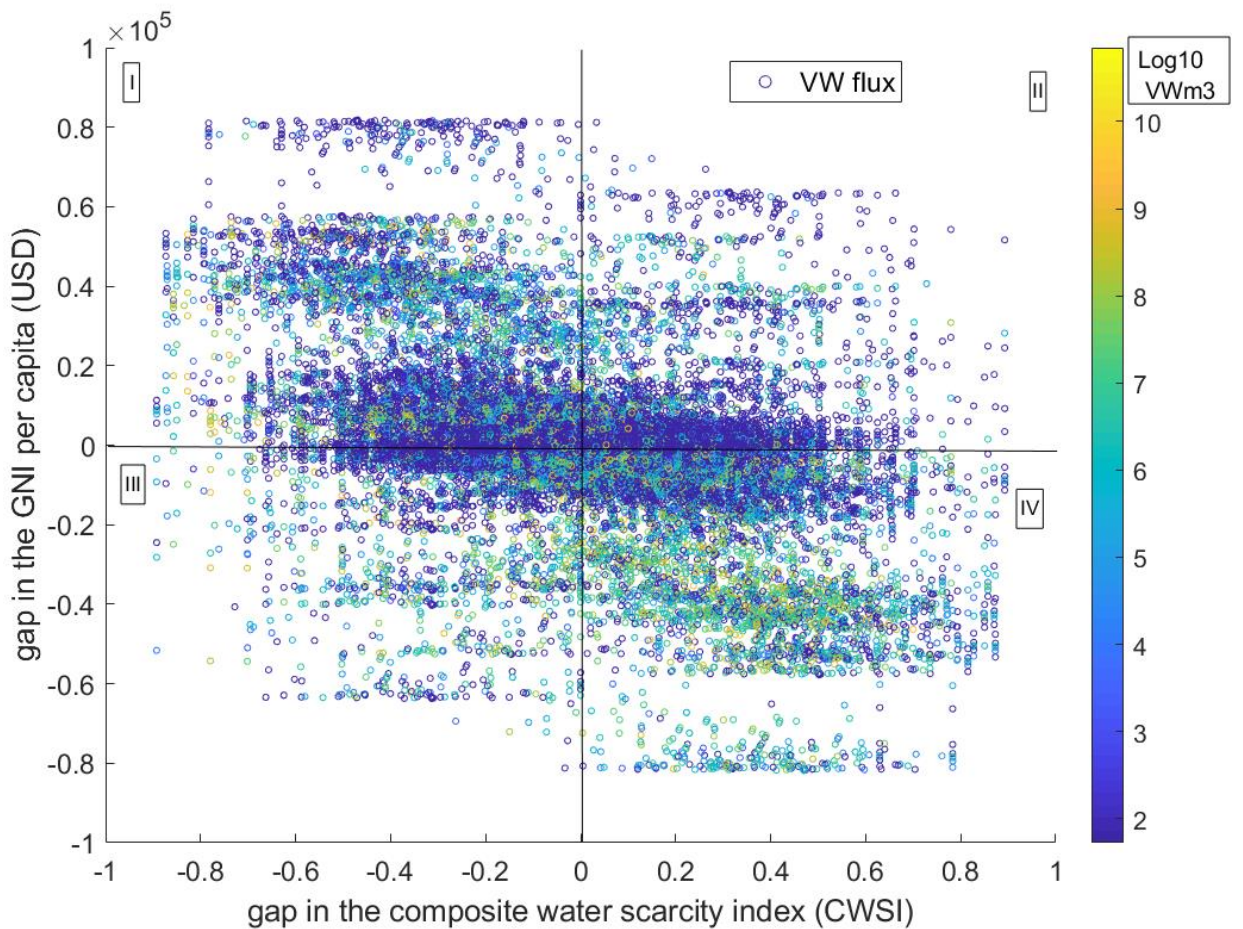

**Table S1.** Largest 20 volumetric and CWSI-weighted virtual water fluxes (2016)

| Volumetric VW fluxes |             |          |                  | CWSI-weighted VW fluxes |             |             |                  |
|----------------------|-------------|----------|------------------|-------------------------|-------------|-------------|------------------|
| Origin               | Destination | m3       | % on world total | Origin                  | Destination | weighted m3 | % on world total |
| Brazil               | China       | 7.04E+10 | 5.54             | Brazil                  | China       | 3.5E+10     | 5.80             |
| USA                  | China       | 5.01E+10 | 3.94             | Indonesia               | India       | 1.39E+10    | 2.31             |
| Indonesia            | India       | 2.43E+10 | 1.91             | USA                     | China       | 1.33E+10    | 2.20             |
| USA                  | Mexico      | 1.87E+10 | 1.47             | Argentina               | China       | 8.8E+09     | 1.46             |
| Indonesia            | China       | 1.39E+10 | 1.10             | Indonesia               | China       | 7.97E+09    | 1.32             |
| Argentina            | China       | 1.39E+10 | 1.09             | Malaysia                | India       | 5.97E+09    | 0.99             |
| USA                  | Japan       | 1.36E+10 | 1.07             | Indonesia               | Pakistan    | 5.09E+09    | 0.84             |
| Canada               | China       | 1.09E+10 | 0.86             | USA                     | Mexico      | 4.96E+09    | 0.82             |
| Netherlands          | Germany     | 1.04E+10 | 0.82             | Argentina               | Brazil      | 4.93E+09    | 0.82             |
| Malaysia             | India       | 1.03E+10 | 0.81             | Malaysia                | China       | 4.17E+09    | 0.69             |
| Australia            | China       | 9.85E+09 | 0.77             | Thailand                | China       | 4.15E+09    | 0.69             |
| Russia               | Egypt       | 9.18E+09 | 0.72             | Thailand                | Malaysia    | 3.92E+09    | 0.65             |
| Indonesia            | Pakistan    | 8.91E+09 | 0.70             | Indonesia               | USA         | 3.87E+09    | 0.64             |
| Argentina            | Brazil      | 7.78E+09 | 0.61             | Ivory Coast             | Netherlands | 3.84E+09    | 0.64             |
| Brazil               | Iran        | 7.61E+09 | 0.60             | Brazil                  | Iran        | 3.79E+09    | 0.63             |
| Thailand             | China       | 7.56E+09 | 0.59             | Ivory Coast             | Algeria     | 3.71E+09    | 0.61             |
| Malaysia             | China       | 7.23E+09 | 0.57             | Kazakhstan              | Uzbekistan  | 3.65E+09    | 0.61             |
| Thailand             | Malaysia    | 7.15E+09 | 0.56             | USA                     | Japan       | 3.6E+09     | 0.60             |
| Australia            | Indonesia   | 6.9E+09  | 0.54             | Mexico                  | USA         | 3.42E+09    | 0.57             |
| Indonesia            | USA         | 6.77E+09 | 0.53             | Ivory Coast             | India       | 3.4E+09     | 0.56             |

**Table S2.** Top 10 countries for net VW export and import, in volumetric values (Equation 7 and 9 in Data and Methods) and weighted for the composite water scarcity index, for the physical scarcity index and for the economic scarcity index (Equations 4 and 5), 2016. The upper layer is referred to absolute figures (percentage on the world total, Eqs 8 and 10). The bottom layer is referred to per capita figures (percentage on the world total, Eqs. 11, 12 and 13).

|                          | No weight |              | Composite scarcity weight |              | Physical scarcity weight |              | Economic scarcity weight |              |        |
|--------------------------|-----------|--------------|---------------------------|--------------|--------------------------|--------------|--------------------------|--------------|--------|
| Total (world share)      | Net exp   | Brazil       | 9.27                      | Indonesia    | 9.70                     | USA          | 13.96                    | Brazil       | 11.00  |
|                          |           | USA          | 8.24                      | Brazil       | 9.46                     | India        | 8.22                     | Indonesia    | 10.41  |
|                          |           | Indonesia    | 7.40                      | Argentina    | 5.71                     | Indonesia    | 7.91                     | Argentina    | 6.46   |
|                          |           | Argentina    | 4.27                      | Ivory Coast  | 4.03                     | Pakistan     | 6.47                     | Ivory Coast  | 4.75   |
|                          |           | Australia    | 3.73                      | Malaysia     | 2.78                     | Thailand     | 3.35                     | Malaysia     | 3.54   |
|                          |           | Canada       | 3.72                      | Thailand     | 2.66                     | Turkmenistan | 3.18                     | Ukraine      | 2.74   |
|                          |           | Russian F.   | 2.77                      | Ukraine      | 2.41                     | Kazakhstan   | 2.02                     | Thailand     | 2.68   |
|                          |           | Ivory Coast  | 2.73                      | USA          | 2.04                     | Argentina    | 1.80                     | Paraguay     | 2.33   |
|                          |           | Thailand     | 2.15                      | Paraguay     | 2.01                     | Un. Arab Em. | 1.63                     | Kazakhstan   | 2.00   |
|                          |           | Malaysia     | 2.15                      | Kazakhstan   | 1.84                     | Bulgaria     | 1.34                     | Canada       | 1.69   |
| Total (world share)      | Net imp   | China        | -16.01                    | China        | -15.08                   | China        | -11.05                   | China        | -15.65 |
|                          |           | Japan        | -3.38                     | Netherlands  | -4.33                    | Turkey       | -3.37                    | Netherlands  | -4.88  |
|                          |           | Germany      | -3.08                     | Germany      | -3.13                    | Japan        | -2.51                    | Germany      | -3.35  |
|                          |           | Netherlands  | -2.62                     | Japan        | -2.74                    | Germany      | -2.01                    | Japan        | -2.71  |
|                          |           | Italy        | -2.18                     | Turkey       | -2.26                    | Iran         | -2.00                    | Spain        | -2.33  |
|                          |           | Turkey       | -2.07                     | Italy        | -2.09                    | Malaysia     | -1.99                    | Italy        | -2.16  |
|                          |           | Spain        | -1.94                     | Spain        | -2.01                    | Bangladesh   | -1.80                    | Turkey       | -2.09  |
|                          |           | Egypt        | -1.92                     | Korea (Rep)  | -1.68                    | Saudi Arabia | -1.69                    | India        | -1.87  |
|                          |           | Korea, Rep   | -1.82                     | Iran         | -1.62                    | Italy        | -1.65                    | Korea (Rep)  | -1.72  |
|                          |           | Viet Nam     | -1.68                     | Egypt        | -1.46                    | Netherlands  | -1.47                    | Egypt        | -1.65  |
| Per capita (world share) | Net exp   | Uruguay      | 5.32                      | Paraguay     | 6.80                     | Turkmenistan | 13.65                    | Paraguay     | 7.26   |
|                          |           | Paraguay     | 5.09                      | Ivory Coast  | 3.88                     | Bulgaria     | 4.58                     | Ivory Coast  | 4.22   |
|                          |           | Australia    | 3.82                      | Uruguay      | 3.87                     | Un. Arab Em. | 4.22                     | Uruguay      | 4.00   |
|                          |           | Ivory Coast  | 2.84                      | Argentina    | 3.01                     | Kazakhstan   | 2.76                     | Argentina    | 3.13   |
|                          |           | Canada       | 2.55                      | Moldova      | 2.89                     | Singapore    | 2.33                     | Moldova      | 3.01   |
|                          |           | Lithuania    | 2.44                      | Turkmenistan | 2.84                     | Estonia      | 2.00                     | Malaysia     | 2.44   |
|                          |           | Argentina    | 2.42                      | Kazakhstan   | 2.37                     | Moldova      | 1.25                     | Kazakhstan   | 2.38   |
|                          |           | Moldova      | 2.08                      | Lithuania    | 2.14                     | Thailand     | 1.18                     | Lithuania    | 2.36   |
|                          |           | Malaysia     | 1.73                      | Malaysia     | 2.08                     | USA          | 1.05                     | Honduras     | 1.85   |
|                          |           | Bulgaria     | 1.68                      | Bulgaria     | 1.89                     | Uruguay      | 1.04                     | Liberia      | 1.75   |
| Per capita (world share) | Net imp   | Netherlands  | -3.81                     | Netherlands  | -5.84                    | Oman         | -3.54                    | Netherlands  | -6.06  |
|                          |           | Belgium      | -3.13                     | Belgium      | -2.70                    | Qatar        | -2.80                    | Singapore    | -3.49  |
|                          |           | Singapore    | -2.72                     | Singapore    | -2.51                    | Benin        | -2.38                    | Belgium      | -2.84  |
|                          |           | Un. Arab Em. | -1.66                     | Oman         | -1.45                    | Netherlands  | -2.10                    | Un. Arab Em. | -1.73  |
|                          |           | Israel       | -1.34                     | Benin        | -1.11                    | Botswana     | -1.69                    | Spain        | -1.06  |
|                          |           | Oman         | -1.30                     | Mauritius    | -1.10                    | Malaysia     | -1.58                    | Mauritius    | -0.99  |
|                          |           | Saudi Arabia | -1.11                     | Qatar        | -1.02                    | Mauritius    | -1.47                    | Oman         | -0.95  |
|                          |           | Kuwait       | -1.10                     | Saudi Arabia | -1.01                    | Kuwait       | -1.47                    | Saudi Arabia | -0.91  |
|                          |           | Mauritius    | -1.05                     | Spain        | -0.99                    | Saudi Arabia | -1.27                    | Benin        | -0.89  |
|                          |           | Spain        | -1.03                     | Portugal     | -0.97                    | Gambia       | -1.12                    | Portugal     | -0.87  |

**Fig. S2** Largest 20 net CWSI-weighted VW importers per capita (negative values for  $sm_i$ ) and largest 20 net CWSI-weighted VW exporters per capita (positive values for  $sm_i$ ), expressed as world share, 2016. Net trade is calculated as export minus import.

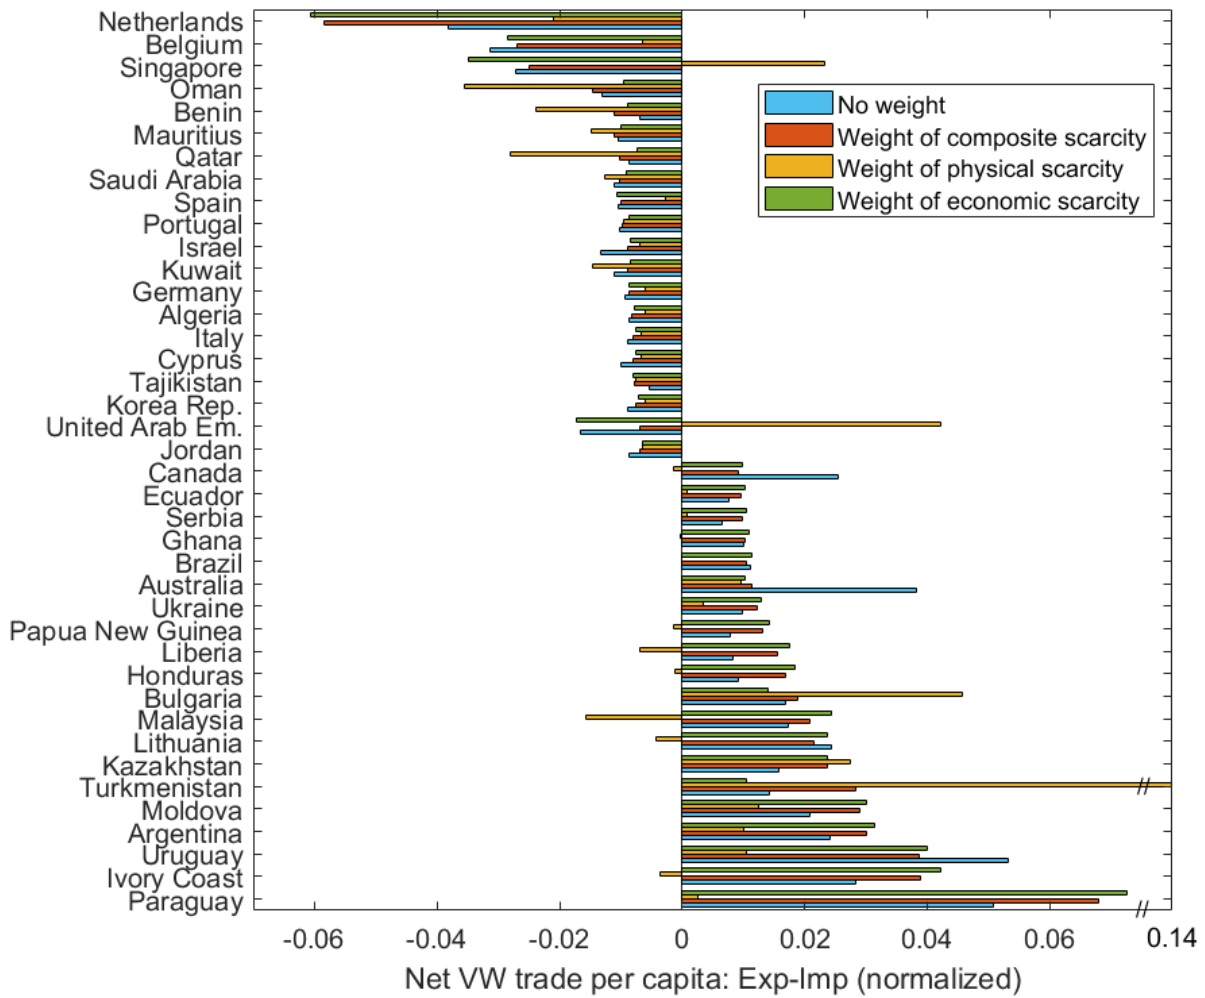

**Table S3. (A)** Gap between the volumetric VW and the economic-scarcity weighted VW for all net exporters per capita (share on the world total, 2016). Negative gap: the net export for economic-scarcity-weighted VW is higher than for the volumetric VW, and *vice versa*. Underlined countries become net importers if the economic scarcity weight is applied. **(B)** Gap between the volumetric VW and the economic-scarcity weighted VW for the all importers per capita (share on the world total, 2016). Positive gap: the net import for economic-scarcity-weighted VW is higher than for the volumetric VW, and *vice versa*. Underlined countries become net exporters if the economic scarcity weight is applied.

| (A) Net exporters per capita | Gap Volumetric VW / economic-scarcity-weighted VW | (B) Net importers per capita                         | Gap Volumetric VW / economic-scarcity-weighted VW |
|------------------------------|---------------------------------------------------|------------------------------------------------------|---------------------------------------------------|
| Paraguay                     | -0.0217                                           | Netherlands                                          | 0.0225                                            |
| Côte d'Ivoire                | -0.0138                                           | Singapore                                            | 0.0078                                            |
| Moldova Rep                  | -0.0093                                           | Tajikistan                                           | 0.0026                                            |
| Liberia                      | -0.0092                                           | Denmark                                              | 0.0025                                            |
| Honduras                     | -0.0092                                           | Greece                                               | 0.0022                                            |
| Kazakhstan                   | -0.0081                                           | Benin                                                | 0.0021                                            |
| Malaysia                     | -0.0071                                           | Uzbekistan                                           | 0.0012                                            |
| Argentina                    | -0.0071                                           | Switzerland                                          | 0.0008                                            |
| Papua New Guinea             | -0.0064                                           | United Arab Em.                                      | 0.0007                                            |
| Costa Rica                   | -0.0052                                           | United Kingdom of Great Britain and Northern Ireland | 0.0004                                            |
| Guatemala                    | -0.0052                                           | Sweden                                               | 0.0004                                            |
| Serbia                       | -0.0041                                           | South Africa                                         | 0.0003                                            |
| Togo                         | -0.0032                                           | Spain                                                | 0.0002                                            |
| Ukraine                      | -0.0030                                           | Syrian Arab Rep.                                     | 0.0002                                            |
| Sri Lanka                    | -0.0027                                           | Bosnia and Herz.                                     | 0.0002                                            |
| Ecuador                      | -0.0026                                           | India                                                | 0.0001                                            |
| Poland                       | -0.0026                                           | Angola                                               | 0.0000                                            |
| Cameroon                     | -0.0023                                           | Finland                                              | 0.0000                                            |
| Timor-Leste                  | -0.0021                                           | Eritrea                                              | 0.0000                                            |
| Nicaragua                    | -0.0019                                           | <u>Korea, DPR</u>                                    | -0.0001                                           |
| Colombia                     | -0.0015                                           | <u>Congo, DR</u>                                     | -0.0001                                           |
| Indonesia                    | -0.0014                                           | Mozambique                                           | -0.0001                                           |
| Ghana                        | -0.0010                                           | Pakistan                                             | -0.0002                                           |
| Nigeria                      | -0.0008                                           | Nepal                                                | -0.0002                                           |
| Ethiopia                     | -0.0006                                           | Kenya                                                | -0.0002                                           |
| Thailand                     | -0.0005                                           | Afghanistan                                          | -0.0002                                           |
| Madagascar                   | -0.0004                                           | Zimbabwe                                             | -0.0002                                           |
| Malawi                       | -0.0004                                           | Gambia                                               | -0.0002                                           |
| Chad                         | -0.0003                                           | Belarus                                              | -0.0003                                           |
| Central African Rep          | -0.0003                                           | Eq. Guinea                                           | -0.0003                                           |
| Rwanda                       | -0.0003                                           | Senegal                                              | -0.0004                                           |
| Cambodia                     | -0.0002                                           | Somalia                                              | -0.0004                                           |
| Burundi                      | -0.0002                                           | Iran                                                 | -0.0004                                           |
| Zambia                       | -0.0002                                           | China                                                | -0.0005                                           |
| Tanzania                     | -0.0002                                           | Lao, PDR                                             | -0.0005                                           |
| Brazil                       | -0.0001                                           | Iraq                                                 | -0.0005                                           |
| Niger                        | -0.0001                                           | Bangladesh                                           | -0.0005                                           |
| Bolivia                      | 0.0000                                            | Cuba                                                 | -0.0005                                           |
| Mali                         | 0.0001                                            | Myanmar                                              | -0.0005                                           |
| Slovakia                     | 0.0002                                            | Sierra Leone                                         | -0.0006                                           |
| Uganda                       | 0.0002                                            | Mauritius                                            | -0.0006                                           |
| Latvia                       | 0.0003                                            | Albania                                              | -0.0006                                           |

| CONT. (A)          |        | CONT. (B)              |         |
|--------------------|--------|------------------------|---------|
| Lithuania          | 0.0008 | Germany                | -0.0007 |
| Burkina Faso       | 0.0013 | Congo                  | -0.0007 |
| Czech Republic     | 0.0016 | Slovenia               | -0.0007 |
| Bulgaria           | 0.0028 | Philippines            | -0.0007 |
| <u>Croatia</u>     | 0.0028 | Lesotho                | -0.0007 |
| Turkmenistan       | 0.0038 | Venezuela              | -0.0008 |
| Hungary            | 0.0041 | Algeria                | -0.0008 |
| Russian Federation | 0.0043 | Turkey                 | -0.0009 |
| Romania            | 0.0064 | Namibia                | -0.0009 |
| France             | 0.0064 | <u>North Macedonia</u> | -0.0010 |
| <u>USA</u>         | 0.0070 | Tunisia                | -0.0011 |
| <u>Estonia</u>     | 0.0105 | Haiti                  | -0.0012 |
| Uruguay            | 0.0132 | Mongolia               | -0.0012 |
| Canada             | 0.0156 | Armenia                | -0.0012 |
| Australia          | 0.0279 | Guinea                 | -0.0013 |
|                    |        | Chile                  | -0.0013 |
|                    |        | Gabon                  | -0.0013 |
|                    |        | Mauritania             | -0.0013 |
|                    |        | Qatar                  | -0.0013 |
|                    |        | Egypt                  | -0.0013 |
|                    |        | Italy                  | -0.0014 |
|                    |        | Botswana               | -0.0015 |
|                    |        | Norway                 | -0.0015 |
|                    |        | Portugal               | -0.0015 |
|                    |        | Korea, Rep.            | -0.0017 |
|                    |        | Azerbaijan             | -0.0017 |
|                    |        | Yemen                  | -0.0017 |
|                    |        | Viet Nam               | -0.0019 |
|                    |        | Saudi Arabia           | -0.0019 |
|                    |        | Austria                | -0.0020 |
|                    |        | Jamaica                | -0.0020 |
|                    |        | Morocco                | -0.0021 |
|                    |        | Japan                  | -0.0021 |
|                    |        | Jordan                 | -0.0021 |
|                    |        | Ireland                | -0.0021 |
|                    |        | New Zealand            | -0.0022 |
|                    |        | <u>Panama</u>          | -0.0023 |
|                    |        | Cyprus                 | -0.0024 |
|                    |        | Mexico                 | -0.0024 |
|                    |        | Trinidad and Tobago    | -0.0024 |
|                    |        | <u>Dominican Rep.</u>  | -0.0024 |
|                    |        | Georgia                | -0.0024 |
|                    |        | Libya                  | -0.0025 |
|                    |        | Kuwait                 | -0.0026 |
|                    |        | <u>Peru</u>            | -0.0028 |
|                    |        | <u>El Salvador</u>     | -0.0028 |
|                    |        | Belgium                | -0.0028 |
|                    |        | Lebanon                | -0.0030 |
|                    |        | Oman                   | -0.0035 |
|                    |        | Israel                 | -0.0048 |

**Figure S3.** Net VW trade per capita status for 40 countries with the highest prevalence of undernourishment among the overall population, and with a composite water scarcity index higher than 0.5 (range: 0-1), 2016. Countries are ranked according to the share of CWSI-weighted VW trade per capita. Net trade is calculated as export minus import.

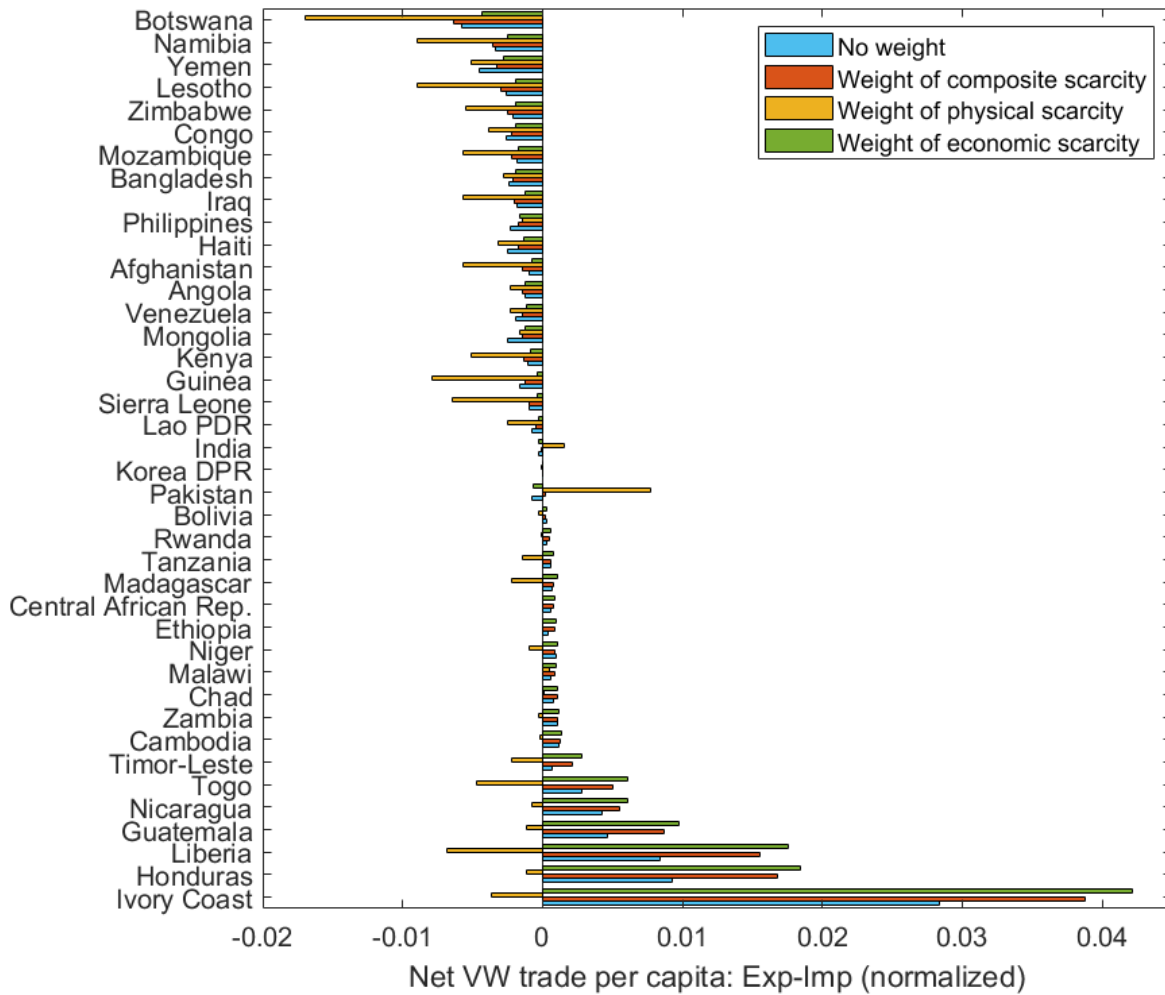

**Table S4.** Countries with indexes of composite water scarcity, physical water scarcity (2017), economic water scarcity (2017), GNI per capita (Atlas method, USD, 2016). The three indexes lie in the range 0-1, where 0 denotes absence of scarcity and 1 denotes maximum scarcity. Sources: Acquastat (2020), UN-Environment (2018), The World Bank (2020b), authors' elaboration.

|                            | Composite<br>scarcity index | Physical<br>scarcity index | Economic<br>scarcity index | GNIpc<br>(USD; 2016) |
|----------------------------|-----------------------------|----------------------------|----------------------------|----------------------|
| Afghanistan                | 0.92                        | 0.31                       | 0.88                       | 570                  |
| Albania                    | 0.59                        | 0.04                       | 0.57                       | 4320                 |
| Algeria                    | 0.92                        | 0.84                       | 0.52                       | 4370                 |
| Angola                     | 0.63                        | 0.00                       | 0.63                       | 3770                 |
| Argentina                  | 0.63                        | 0.04                       | 0.62                       | 12220                |
| Armenia                    | 0.77                        | 0.37                       | 0.64                       | 3760                 |
| Australia                  | 0.17                        | 0.03                       | 0.15                       | 54140                |
| Austria                    | 0.13                        | 0.04                       | 0.09                       | 46220                |
| Azerbaijan                 | 0.58                        | 0.37                       | 0.34                       | 4760                 |
| Bangladesh                 | 0.51                        | 0.03                       | 0.50                       | 1370                 |
| Belarus                    | 0.63                        | 0.02                       | 0.62                       | 5620                 |
| Belgium                    | 0.39                        | 0.22                       | 0.22                       | 43440                |
| Benin                      | 0.38                        | 0.00                       | 0.37                       | 1110                 |
| Bolivia                    | 0.51                        | 0.00                       | 0.51                       | 3040                 |
| Bosnia and Herzegovina     | 0.40                        | 0.01                       | 0.39                       | 5130                 |
| Botswana                   | 0.60                        | 0.02                       | 0.59                       | 6570                 |
| Brazil                     | 0.50                        | 0.01                       | 0.49                       | 8920                 |
| Bulgaria                   | 0.56                        | 0.27                       | 0.40                       | 7430                 |
| Burkina Faso               | 0.41                        | 0.06                       | 0.37                       | 660                  |
| Burundi                    | 0.69                        | 0.02                       | 0.68                       | 270                  |
| Cambodia                   | 0.55                        | 0.00                       | 0.54                       | 1140                 |
| Cameroon                   | 0.66                        | 0.00                       | 0.66                       | 1380                 |
| Canada                     | 0.23                        | 0.01                       | 0.22                       | 43870                |
| Central African Republic   | 0.69                        | 0.00                       | 0.69                       | 410                  |
| Chad                       | 0.69                        | 0.02                       | 0.68                       | 730                  |
| Chile                      | 0.78                        | 0.04                       | 0.77                       | 13370                |
| China                      | 0.41                        | 0.21                       | 0.26                       | 8270                 |
| Colombia                   | 0.50                        | 0.00                       | 0.50                       | 6460                 |
| Congo                      | 0.68                        | 0.00                       | 0.68                       | 1820                 |
| Congo, Democratic Republic | 0.69                        | 0.00                       | 0.69                       | 470                  |
| Costa Rica                 | 0.58                        | 0.03                       | 0.57                       | 10770                |
| Côte d'Ivoire              | 0.68                        | 0.01                       | 0.68                       | 1840                 |
| Croatia                    | 0.11                        | 0.01                       | 0.10                       | 12380                |
| Cuba                       | 0.34                        | 0.18                       | 0.20                       | 7480                 |
| Cyprus                     | 0.34                        | 0.28                       | 0.09                       | 24700                |
| Czech Republic             | 0.31                        | 0.12                       | 0.21                       | 17590                |
| Denmark                    | 0.18                        | 0.12                       | 0.07                       | 58040                |
| Dominican Republic         | 0.75                        | 0.30                       | 0.64                       | 6860                 |
| Ecuador                    | 0.59                        | 0.02                       | 0.58                       | 5810                 |
| Egypt                      | 1.00                        | 1.00                       | 0.60                       | 3460                 |
| El Salvador                | 0.80                        | 0.08                       | 0.79                       | 3510                 |
| Equatorial Guinea          | 0.76                        | 0.00                       | 0.76                       | 8270                 |



|                              |      |      |      |       |
|------------------------------|------|------|------|-------|
| Eritrea                      | 0.34 | 0.08 | 0.28 | 600   |
| Estonia                      | 0.31 | 0.14 | 0.20 | 18280 |
| Ethiopia                     | 0.71 | 0.09 | 0.69 | 670   |
| Finland                      | 0.30 | 0.06 | 0.25 | 45490 |
| France                       | 0.14 | 0.13 | 0.02 | 39070 |
| Gabon                        | 0.86 | 0.00 | 0.86 | 7080  |
| Gambia                       | 0.71 | 0.01 | 0.70 | 620   |
| Georgia                      | 0.66 | 0.03 | 0.65 | 4080  |
| Germany                      | 0.26 | 0.16 | 0.12 | 44290 |
| Ghana                        | 0.52 | 0.02 | 0.51 | 1820  |
| Greece                       | 0.30 | 0.16 | 0.17 | 18890 |
| Guatemala                    | 0.76 | 0.03 | 0.75 | 3870  |
| Guinea                       | 0.76 | 0.00 | 0.76 | 780   |
| Haiti                        | 0.74 | 0.10 | 0.71 | 780   |
| Honduras                     | 0.80 | 0.02 | 0.80 | 2120  |
| Hungary                      | 0.30 | 0.04 | 0.27 | 13050 |
| India                        | 0.64 | 0.34 | 0.46 | 1680  |
| Indonesia                    | 0.57 | 0.11 | 0.52 | 3400  |
| Iran                         | 0.81 | 0.68 | 0.41 | 5500  |
| Iraq                         | 0.86 | 0.43 | 0.75 | 5620  |
| Ireland                      | 0.21 | 0.01 | 0.20 | 52490 |
| Israel                       | 0.72 | 0.67 | 0.15 | 36360 |
| Italy                        | 0.55 | 0.18 | 0.45 | 31950 |
| Jamaica                      | 0.62 | 0.13 | 0.57 | 4600  |
| Japan                        | 0.24 | 0.19 | 0.06 | 37860 |
| Jordan                       | 0.98 | 0.96 | 0.37 | 3930  |
| Kazakhstan                   | 0.76 | 0.21 | 0.70 | 8770  |
| Kenya                        | 0.54 | 0.13 | 0.47 | 1350  |
| Korea, Republic              | 0.60 | 0.42 | 0.32 | 29330 |
| Kuwait                       | 1.00 | 1.00 | 0.19 | 36880 |
| Lao People's Democratic Rep. | 0.64 | 0.01 | 0.64 | 2120  |
| Latvia                       | 0.36 | 0.01 | 0.36 | 14600 |
| Lebanon                      | 0.81 | 0.40 | 0.68 | 7230  |
| Lesotho                      | 0.68 | 0.01 | 0.67 | 1300  |
| Liberia                      | 0.85 | 0.00 | 0.85 | 620   |
| Libya                        | 1.00 | 1.00 | 0.53 | 4550  |
| Lithuania                    | 0.44 | 0.01 | 0.43 | 14870 |
| Macedonia, The former YR     | 0.79 | 0.08 | 0.78 | 4980  |
| Madagascar                   | 0.65 | 0.04 | 0.64 | 470   |
| Malawi                       | 0.63 | 0.08 | 0.60 | 340   |
| Malaysia                     | 0.58 | 0.01 | 0.57 | 10150 |
| Mali                         | 0.49 | 0.04 | 0.47 | 780   |
| Mauritania                   | 0.60 | 0.12 | 0.55 | 1510  |
| Mauritius                    | 0.50 | 0.22 | 0.36 | 10640 |
| Mexico                       | 0.60 | 0.19 | 0.51 | 9400  |
| Moldova, Republic            | 0.71 | 0.07 | 0.68 | 3180  |
| Mongolia                     | 0.58 | 0.01 | 0.57 | 3500  |
| Morocco                      | 0.59 | 0.36 | 0.36 | 2880  |
| Mozambique                   | 0.46 | 0.01 | 0.45 | 530   |

|                      |      |      |      |       |
|----------------------|------|------|------|-------|
| Myanmar              | 0.73 | 0.03 | 0.73 | 1280  |
| Namibia              | 0.41 | 0.01 | 0.41 | 4700  |
| Nepal                | 0.69 | 0.05 | 0.67 | 770   |
| Netherlands          | 0.15 | 0.09 | 0.07 | 46900 |
| New Zealand          | 0.44 | 0.03 | 0.42 | 39390 |
| Nicaragua            | 0.58 | 0.01 | 0.58 | 2000  |
| Niger                | 0.53 | 0.05 | 0.50 | 500   |
| Nigeria              | 0.66 | 0.04 | 0.65 | 2470  |
| Norway               | 0.37 | 0.01 | 0.37 | 81810 |
| Oman                 | 1.00 | 1.00 | 0.67 | 15810 |
| Pakistan             | 0.91 | 0.81 | 0.50 | 1420  |
| Panama               | 0.64 | 0.01 | 0.63 | 12780 |
| Papua New Guinea     | 0.75 | 0.00 | 0.75 | 2700  |
| Paraguay             | 0.68 | 0.01 | 0.68 | 5390  |
| Peru                 | 0.71 | 0.01 | 0.70 | 6110  |
| Philippines          | 0.59 | 0.19 | 0.49 | 3450  |
| Poland               | 0.67 | 0.17 | 0.61 | 12680 |
| Portugal             | 0.35 | 0.12 | 0.26 | 19930 |
| Qatar                | 1.00 | 1.00 | 0.18 | 64010 |
| Romania              | 0.30 | 0.03 | 0.28 | 9650  |
| Russian Federation   | 0.22 | 0.01 | 0.21 | 9730  |
| Rwanda               | 0.66 | 0.01 | 0.65 | 750   |
| Saudi Arabia         | 1.00 | 1.00 | 0.43 | 21610 |
| Senegal              | 0.50 | 0.06 | 0.47 | 1270  |
| Serbia               | 0.71 | 0.03 | 0.70 | 5690  |
| Sierra Leone         | 0.81 | 0.00 | 0.81 | 490   |
| Singapore            | 0.84 | 0.83 | 0.02 | 53020 |
| Slovakia             | 0.35 | 0.01 | 0.34 | 16790 |
| Slovenia             | 0.44 | 0.03 | 0.42 | 21750 |
| South Africa         | 0.59 | 0.38 | 0.35 | 5470  |
| Spain                | 0.41 | 0.28 | 0.18 | 27530 |
| Sri Lanka            | 0.81 | 0.25 | 0.75 | 3810  |
| Sweden               | 0.13 | 0.01 | 0.12 | 54370 |
| Switzerland          | 0.22 | 0.04 | 0.19 | 82110 |
| Syrian Arab Republic | 0.89 | 0.84 | 0.30 | 1820  |
| Tajikistan           | 0.81 | 0.51 | 0.61 | 1100  |
| Tanzania             | 0.52 | 0.05 | 0.50 | 970   |
| Thailand             | 0.55 | 0.13 | 0.48 | 5700  |
| Timor-Leste          | 0.88 | 0.14 | 0.86 | 1750  |
| Togo                 | 0.68 | 0.01 | 0.68 | 610   |
| Trinidad and Tobago  | 0.77 | 0.09 | 0.75 | 16720 |
| Tunisia              | 1.00 | 1.00 | 0.46 | 3750  |
| Turkey               | 0.50 | 0.28 | 0.31 | 11180 |
| Turkmenistan         | 1.00 | 1.00 | 0.35 | 6820  |
| Uganda               | 0.42 | 0.01 | 0.41 | 790   |
| Ukraine              | 0.63 | 0.05 | 0.61 | 2370  |
| United Arab Emirates | 1.00 | 1.00 | 0.25 | 40570 |
| United Kingdom       | 0.28 | 0.06 | 0.23 | 42980 |
| USA                  | 0.26 | 0.14 | 0.14 | 57180 |

|             |      |      |      |       |
|-------------|------|------|------|-------|
| Uruguay     | 0.39 | 0.02 | 0.38 | 14980 |
| Uzbekistan  | 1.00 | 1.00 | 0.55 | 2660  |
| Venezuela   | 0.54 | 0.02 | 0.53 | 13080 |
| Viet Nam    | 0.66 | 0.09 | 0.62 | 2080  |
| Yemen       | 1.00 | 1.00 | 0.61 | 1070  |
| Sudan       | 0.89 | 0.71 | 0.60 | 1570  |
| South Sudan | 0.62 | 0.01 | 0.62 | 1090  |
| Zambia      | 0.55 | 0.02 | 0.54 | 1370  |
| Zimbabwe    | 0.49 | 0.17 | 0.39 | 1290  |

---

**Table S5.** Primary crops included in the study. Source: Tamea et al. (2021).

| FAO code | Product                       |
|----------|-------------------------------|
| 15       | Wheat                         |
| 27       | Rice, paddy                   |
| 44       | Barley                        |
| 56       | Maize                         |
| 71       | Rye                           |
| 75       | Oats                          |
| 79       | Millet                        |
| 83       | Sorghum                       |
| 89       | Buckwheat                     |
| 94       | Fonio                         |
| 97       | Triticale                     |
| 101      | Canary seed                   |
| 103      | Mixed grain                   |
| 116      | Potatoes                      |
| 122      | Sweet potatoes                |
| 125      | Cassava                       |
| 149      | Roots and Tubers, nes         |
| 157      | Sugar beet                    |
| 161      | Sugar crops, nes              |
| 176      | Beans, dry                    |
| 181      | Broad beans, horse beans, dry |
| 187      | Peas, dry                     |
| 191      | Chick peas                    |
| 201      | Lentils                       |
| 203      | Bambara beans                 |
| 205      | Vetches                       |
| 217      | Cashew nuts, with shell       |
| 220      | Chestnuts                     |
| 222      | Walnuts, with shell           |
| 223      | Pistachios                    |
| 224      | Kolanuts                      |
| 234      | Nuts, nes                     |
| 236      | Soybeans                      |
| 249      | Coconuts                      |
| 257      | Palm oil                      |
| 258      | Oil, palm kernel              |
| 260      | Olives                        |
| 267      | Sunflower seed                |
| 270      | Rapeseed                      |
| 289      | Sesame seed                   |
| 292      | Mustard seed                  |
| 296      | Poppy seed                    |
| 311      | Kapokseed in shell            |
| 329      | Cottonseed                    |
| 333      | Linseed                       |
| 339      | Oilseeds, Nes                 |

|     |                                    |
|-----|------------------------------------|
| 358 | Cabbages and other brassicas       |
| 366 | Artichokes                         |
| 367 | Asparagus                          |
| 372 | Lettuce and chicory                |
| 373 | Spinach                            |
| 388 | Tomatoes                           |
| 393 | Cauliflowers and broccoli          |
| 394 | Pumpkins, squash and gourds        |
| 397 | Cucumbers and gherkins             |
| 399 | Eggplant-baseds (aubergines)       |
| 401 | Chillies and peppers, green        |
| 402 | Onions (inc. shallots), green      |
| 403 | Onions, dry                        |
| 406 | Garlic                             |
| 407 | Leeks, other alliaceous vegetables |
| 414 | Beans, green                       |
| 417 | Peas, green                        |
| 426 | Carrots and turnips                |
| 446 | Maize, green                       |
| 449 | Mushrooms and truffles             |
| 463 | Vegetables fresh nes               |
| 486 | Bananas                            |
| 489 | Plantains                          |
| 490 | Oranges                            |
| 495 | Tangerines, mandarins, clem.       |
| 497 | Lemons and limes                   |
| 507 | Grapefruit (inc. pomelos)          |
| 515 | Apples                             |
| 521 | Pears                              |
| 523 | Quinces                            |
| 526 | Apricots                           |
| 530 | Sour cherries                      |
| 531 | Cherries                           |
| 534 | Peaches and nectarines             |
| 536 | Plums and sloes                    |
| 544 | Strawberries                       |
| 549 | Gooseberries                       |
| 550 | Currants                           |
| 552 | Blueberries                        |
| 554 | Cranberries                        |
| 560 | Grapes                             |
| 567 | Watermelons                        |
| 568 | Other melons (inc.cantaloupes)     |
| 569 | Figs                               |
| 571 | Mangoes, mangosteens, guavas       |
| 572 | Avocados                           |
| 574 | Pineapples                         |
| 577 | Dates                              |
| 587 | Persimmons                         |

|     |                                |
|-----|--------------------------------|
| 591 | Cashew apple                   |
| 592 | Kiwi fruit                     |
| 600 | Papayas                        |
| 603 | Fruit, tropical fresh nes      |
| 619 | Fruit Fresh Nes                |
| 656 | Coffee, green                  |
| 661 | Cocoa beans                    |
| 667 | Tea                            |
| 671 | Maté                           |
| 677 | Hops                           |
| 687 | Pepper (Piper spp.)            |
| 689 | Chillies and peppers, dry      |
| 692 | Vanilla                        |
| 693 | Cinnamon (canella)             |
| 698 | Cloves                         |
| 702 | Nutmeg, mace and cardamoms     |
| 711 | Anise, badian, fennel, corian. |
| 720 | Ginger                         |
| 723 | Spices, nes                    |
| 748 | Peppermint                     |
| 767 | Cotton lint                    |
| 770 | Cotton linters                 |
| 773 | Flax fibre and tow             |
| 778 | Kapok fibre                    |
| 780 | Jute                           |
| 809 | Manila Fibre (Abaca)           |
| 826 | Tobacco, unmanufactured        |
| 836 | Natural rubber                 |

---

## References

AQUASTAT (2020) Core Database, Food and Agriculture Organization of the United Nations.

Tamea, S., Tuninetti, M., Soligno, I., and Laio, F. (2021). Virtual water trade and water footprint of agricultural goods: the 1961–2016 CWASI database, *Earth System Science Data*, 13, 1–27.

The World Bank, 2020b, World Development Indicators, DataBank, <https://databank.worldbank.org/source/world-development-indicators>

UN Environment (2018) *Progress on integrated water resources management. Global baseline for SDG 6. Indicator 6.5.1: degree of IWRM implementation*. UNEP.
